# Supplementary material
Source: Springer Nature journal article supplement (https://mijn.bsl.nl/resource/supplementary/13047_2013_574_MOESM2_ESM.pdf/7112490)

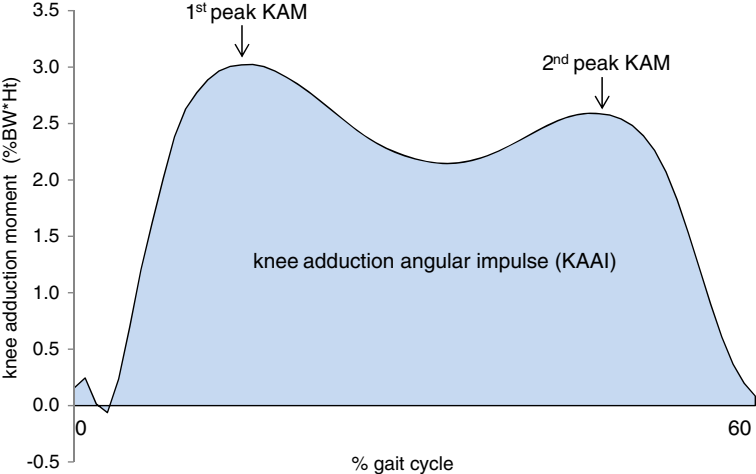

Supplement: MOESM2 [file 7112490]
